# Calcitonin Gene-related Peptide Is Involved in Inflammatory Pain but Not in Postoperative Pain

Kumiko Ishida, M.D., Tomoyuki Kawamata, M.D., Satoshi Tanaka, M.D., Takayuki Shindo, M.D., Mikito Kawamata, M.D.

## ABSTRACT

**Background:** The aim of this study was to clarify the roles of calcitonin gene-related peptide (CGRP) in postoperative pain and inflammatory pain.

**Methods:**  $\alpha$ CGRP knockout mice that the authors have developed and wild-type mice were used. Pain behaviors were assessed after incision and complete Freund's adjuvant (CFA) injection. Changes in CGRP and c-Fos expression in the dorsal horn were also examined.

**Results:** Guarding pain scores in  $\alpha$ CGRP knockout mice were lower than those in wild-type mice at 24 h ( $3.8 \pm 1.6$  vs.  $6.8 \pm 1.5$ ,  $P = 0.044$ ) and 48 h ( $1.8 \pm 1.7$  vs.  $6.0 \pm 1.5$ ,  $P = 0.001$ ) after CFA injection ( $n = 8$  to  $9$ ). Withdrawal latencies to heat stimulation in  $\alpha$ CGRP knockout mice were higher than those in wild-type mice at 24 to 72 h after CFA injection ( $4.9 \pm 1.0$  vs.  $3.4 \pm 0.8$  at 24 h,  $P = 0.04$ ;  $5.1 \pm 0.3$  vs.  $3.2 \pm 0.9$  at 48 h,  $P = 0.047$ ; and  $5.4 \pm 1.6$  vs.  $3.5 \pm 0.5$  s at 72 h,  $P = 0.045$ ) ( $n = 11$  to  $13$ ), but withdrawal thresholds to mechanical stimulation were comparable. CGRP expression was increased at 24 h after CFA injection in wild-type mice, and the c-Fos-positive profile was increased at 4 h after CFA injection (ipsilateral vs. contralateral:  $12.3 \pm 4.6$  vs.  $1.3 \pm 1.9$ ,  $P < 0.0001$ ) and maintained at 24 h ( $10.0 \pm 4.1$  vs.  $0.8 \pm 1.3$ ,  $P < 0.0001$ ) ( $n = 4$  to  $6$ ).

**Conclusion:** These results suggest that contribution of the  $\alpha$ CGRP system depends on the modality of pain and the stage of inflammation. (ANESTHESIOLOGY 2014; 121:1068-79)

TO better understand the mechanisms of pain and to develop new pain treatments, much effort has been spent developing and analyzing preclinical models of pathophysiological pain. A postoperative pain model and an inflammatory pain model have been widely used to understand the pathophysiological pain associated with tissue injury and inflammation. These two pain models share common behavioral phenotypes as acute pain including spontaneous pain, thermal hyperalgesia, and mechanical hyperalgesia.<sup>1,2</sup> However, recent studies have shown that the mechanisms of postoperative pain are different from those of inflammatory pain.<sup>2</sup>

Calcitonin gene-related peptide (CGRP), which is a 37-amino-acid neuropeptide widely distributed in the peripheral and central nervous systems, is a member of a family of structurally and biologically related polypeptides, including adrenomedullin, amylin, calcitonin, and calcitonin receptor-stimulating peptide. CGRP exists as  $\alpha$  and  $\beta$  isoforms that are derived from different genes.<sup>3</sup>  $\alpha$ CGRP is abundantly expressed in dorsal root ganglion (DRG) neurons, whereas  $\beta$ CGRP coexists with  $\alpha$ CGRP in DRG neurons at a much lower expression level than that of  $\alpha$ CGRP.<sup>4</sup> Because CGRP has long been served as a molecular marker of peptidergic nociceptive neurons,<sup>5</sup> CGRP has been expected to play an important

### What We Already Know about This Topic

- Inflammatory and incisional pain share several pain-related phenotypes, but may have different underlying signaling mechanisms.

### What This Article Tells Us That Is New

- Mice deficient in the  $\alpha$  isoform of calcitonin gene-related peptide (CGRP) display reduced pain-related behaviors after the injection of complete Freund's adjuvant (CFA). No CGRP-related differences were observed after incision. CGRP-deficient mice also had reduced spinal cord Fos expression after CFA injection.
- These data distinguish incision- and inflammation-related pain on a biochemical level.

role in pathophysiological nociceptive pain. Actually, in calcitonin/ $\alpha$ CGRP knockout mice, intraarticular carrageenan/kaolin-induced thermal hyperalgesia was significantly inhibited, suggesting that  $\alpha$ CGRP is involved in thermal hyperalgesia in joint inflammation.<sup>6</sup> In addition, spinal administration of a CGRP receptor antagonist, CGRP<sub>8-37</sub>, inhibited hyperalgesia after inflammation and spinal cord injury, suggesting that spinal CGRP is involved in hyperalgesia.<sup>7,8</sup> However, it remains to be elucidated in which types of pathophysiological nociceptive pain, postoperative pain and/or inflammatory

Submitted for publication November 9, 2013. Accepted for publication June 6, 2014. From the Department of Anesthesiology and Resuscitology, Shinshu University School of Medicine, Matsumoto, Japan (K.I., T.K., S.T., M.K.); and Department of Cardiovascular Research, Shinshu University Graduate School of Medicine, Matsumoto, Japan (T.S.).

Copyright © 2014, the American Society of Anesthesiologists, Inc. Lippincott Williams & Wilkins. Anesthesiology 2014; 121:1068-79

pain, CGRP is involved. It has also not been elucidated in which modalities of pathophysiological pain CGRP is involved.

We hypothesized that the CGRP-related systems differentially contribute to the development of various types of pain such as inflammatory pain and postoperative pain. We have originally developed  $\alpha$ CGRP knockout mice in which  $\alpha$ CGRP but not calcitonin is depleted.<sup>9</sup> The aim of this study was thus to clarify the roles of  $\alpha$ CGRP in the two types of pathophysiological nociceptive pain using  $\alpha$ CGRP knockout mice.

## Materials and Methods

All the protocols of this study were approved by the Animal Care and Use Committee of Shinshu University School of Medicine, Matsumoto, Japan (reference No. 09-015). Mice were treated in accordance with the Ethics Guidelines for Investigations of Experimental Pain in Conscious Animals as issued by the International Association for the Study of Pain. Every effort was made to minimize animal suffering and to reduce the number of animals used in this study.

### Animals

We used male  $\alpha$ CGRP knockout mice weighing 25 to 30 g with the genetic background of the 129SV  $\times$  C57BL/6 hybrid as we previously reported<sup>9</sup> and their male wild-type (WT) littermate controls.  $\alpha$ CGRP knockout mice are healthy, show normal behavior, and have no visible phenotype different from that of normal mice.<sup>10</sup> Mice housed in groups of four animals were maintained on a 12-h light–dark cycle with food and water available *ad libitum*.

### Animal Models of Pain

Mice were randomly divided by computer-generated randomization into two groups, incision or complete Freund's adjuvant (CFA; Sigma, St. Louis, MO) injection. Mice were anesthetized with 2 to 3% halothane in 100% oxygen. To make a postoperative pain model, a plantar incision was made according to a modification of a previous report.<sup>11</sup> In brief, a 6-mm longitudinal incision was made with a number 11 blade through the skin, fascia, and muscle of the right hind paw. The skin was apposed with two single sutures of 7-0 nylon. The wound was covered with antibiotic ointment.

In another series of experiments, mice received a subcutaneous injection of 20  $\mu$ l of CFA to make an inflammatory pain model. In brief, during anesthesia with 2 to 3% halothane in 100% oxygen, CFA or a vehicle (0.9% saline) was injected in the plantar surface of the right hind paw using a Hamilton syringe with a 30-gauge needle. After both types of injury, anesthesia was discontinued and mice were allowed to recover in their cages.

### Assessment of Paw Edema

The degree of edema, which is indicative of the intensity of inflammation, was evaluated by measuring the paw thickness according to a previously described method.<sup>1</sup> The maximal dorso-ventral thickness of the paw was measured using calipers before and 2, 4, 6, and 24 h after incision or CFA injection.

### Behavioral Testing

To habituate mice to the testing environment, they were acclimated for 2 days. The basal value in each behavioral test before incision or CFA injection was obtained on the third day. The following behavioral tests were performed for each paw before and 2, 4, 6, 24, 48, 72, 120, and 168 h after incision or CFA injection. The person performing the following tests was blinded to the treatment and genotypes of mice.

The guarding pain score (GPS) of the hind paws was calculated to assess the spontaneous pain-related behavior according to a previously described method.<sup>12</sup> Unrestrained mice were placed on a stainless steel mesh floor (openings, 8  $\times$  8 mm) under a clear plastic cage and allowed to acclimate for 15 min. GPS was calculated on the basis of weight bearing. Both paws of each animal were closely observed during a 1-min period repeated every 5 min for 30 min. Depending on the position in which the paw was found during the scoring period, a score of 0, 1, or 2 was given. Full weight bearing on the paw (score = 0) was present if the wound was blanched or distorted by the mesh. If the area of the wound touched the mesh without blanching or distorting, a score of 1 was given. If the paw was completely off the mesh, a score of 2 was recorded. The sum of six scores (0 to 12) was used to assess the pain in the incised or CFA-injected paw.

Mice were placed on a stainless mesh floor covered with a clear plastic cage top. For testing mechanical responses, calibrated von Frey filaments were applied adjacent to the wound in unrestrained mice. We determined the 50% mechanical withdrawal threshold (MT) by the “up–down method” according to a previous report.<sup>13</sup> A series of seven von Frey filaments (0.7-, 1.6-, 4-, 6-, 10-, 14-, and 20-mN forces) were used. Testing was initiated with 6 mN forces. Whenever a positive response occurred, the next weaker von Frey filament was applied. Whenever a negative response occurred, the next stronger one was applied. The test was continued until the response of six stimuli after the first change in response had been obtained or the test reached either end of the spectrum of the von Frey set. MT was calculated by using the formula by Chaplan *et al.*<sup>13</sup>:  $50\% \text{ MT} = (10^{[X_f + k\delta]})/10,000$ , where  $X_f$  = value (in log units) of the final von Frey filament used;  $k$  = tabular values for the pattern of positive/negative responses; and  $\delta$  = mean difference (in log units) between stimuli (here, 0.22).

Paw withdrawal latency (PWL) to noxious heat stimuli was assessed by applying a focused radiant heat source (model number 37370; Ugo Basil, Comerio, Italy) to unrestrained

mice. The latency to evoke a withdrawal response was determined with a cutoff value of 20 s to avoid tissue damage. The intensity of the heat was adjusted so that the basal PWL was 10 to 15 s in WT mice.

In a separate study, to determine through which site (spinal or peripheral) CGRP contributes to the CFA-induced inflammatory pain, mice were randomly divided into seven groups. These groups were given intraplantar administration of CGRP<sub>8-37</sub> (Peptide Institute Inc., Osaka, Japan) at doses of 0.05, 0.5, and 5 nmol in 20  $\mu$ l saline or intrathecal administration of CGRP<sub>8-37</sub> at doses of 0.005, 0.05, and 0.5 nmol in 10  $\mu$ l of saline or a vehicle. The person performing the behavioral experiments was blinded to the drug and dose. A Hamilton syringe attached to a 30-gauge needle was used for intrathecal or intraplantar administration. CGRP<sub>8-37</sub> was intrathecally administered *via* the interspace between L4 and L5 vertebrae according to a previously described method.<sup>14</sup> For intraplantar administration, CGRP<sub>8-37</sub> was injected into the right hind paw where CFA had been injected. PWLs to noxious heat stimuli were assessed before and 10, 20, 30, 45, and 60 min after intrathecal or intraplantar administration.

After behavioral tests, some animals were used for subsequent immunohistochemical studies. The remaining animals were euthanized 7 days after incision or CFA injection.

### Immunohistochemical Studies

In both  $\alpha$ CGRP knockout mice and WT mice, some naive animals were just anesthetized with 2 to 3% halothane in 100% oxygen without incision or CFA injection and considered as "controls." We used polyclonal antibodies raised against the following molecules:  $\alpha\beta$ CGRP (1:8,000, C8198, rabbit; Sigma), c-Fos (1:20,000, PC38; rabbit; Merck, Darmstadt, Germany), and protein kinase C $\gamma$  (PKC $\gamma$ ; 1:200, PKCg-Go-Af840, goat; Frontier Institute, Sapporo, Japan). Immunohistochemical analysis was conducted 4 and 24 h after incision and CFA injection. Mice were deeply anesthetized with 0.2 ml intraperitoneal urethane (0.24 g/ml) and perfused transcardially with 4% paraformaldehyde in 0.1-M phosphate buffer. The L4 to L5 segments of the spinal cord were removed. The spinal cord was immersed in 4% paraformaldehyde in phosphate buffer for 2 h for postfixation and then cryoprotected in 25% sucrose in phosphate-buffered saline (PBS) overnight at 4°C. The samples were placed in TissueTek embedding medium (Sakura, Tokyo, Japan) and rapidly frozen. The spinal cord was cut at 50- $\mu$ m thickness using a sliding cryostat (Sakura). The following procedure was performed in a free-floating state. The tissue sections were washed in PBS and incubated for 1 h at room temperature in a blocking solution consisting of 10% normal donkey serum and 0.2% TritonX-100 (Sigma) in PBS (PBS-t). Sections were then incubated with a mixture of primary antibodies overnight at 4°C. After rinsing with PBS-t, the sections were incubated with Alexa Fluor 594-labeled and Alexa 647-labeled

species-specific secondary antibodies at a dilution of 1:500 (Invitrogen, Carlsbad, CA) in PBS-t for 90 min at room temperature. Images were taken with a confocal laser scanning microscope (DIGITAL ECLIPSE C1; Nikon, Tokyo, Japan). In all cases, images were a single stack and were acquired with line-by-line sequential scanning to prevent bleed-through and cross-excitation of fluorophores.

Calcitonin gene-related peptide and c-Fos expression in the superficial dorsal horn (SDH) of the L4 to L5 segments was quantitatively analyzed according to the following method. The SDH (laminae I and II) was defined by the PKC $\gamma$ -labeled area (fig. 1). Because the area labeled by PKC $\gamma$  corresponds to the ventral part of lamina II in the mouse spinal cord,<sup>15</sup> the SDH was defined as the PKC $\gamma$ -labeled area and the area dorsal to it in the dorsal horn. Four to six mice from each group were used for quantitative measurement of CGRP expression. Analyses were performed on five randomly selected sections from each animal. Images of sections were imported into Win Roof 6.1 software (Mitani, Fukui, Japan). Changes in CGRP staining were quantified using gray scales (0-black to 255-white). The relative intensity of the gray level was determined by dividing the gray level on the ipsilateral side to the treatment by that on the contralateral side in each pain model. The average relative

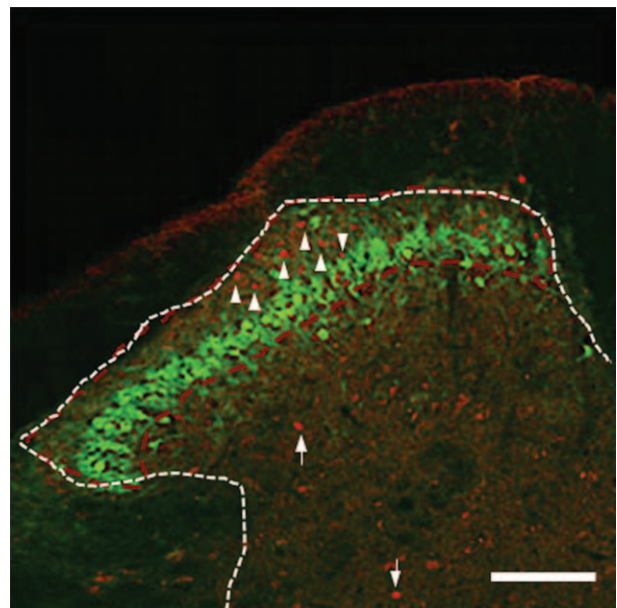

**Fig. 1.** Superficial dorsal horn (SDH) defined by protein kinase C $\gamma$  (PKC $\gamma$ ). The SDH of the L4 to L5 segments of the spinal cord was defined by the PKC $\gamma$ -labeled area. Because the area labeled by PKC $\gamma$  corresponds to the ventral part of lamina II in the mouse spinal cord, the SDH was defined as the PKC $\gamma$ -labeled area and the area dorsal to it in the dorsal horn. *Green* and *red* indicate PKC $\gamma$  and c-Fos immunoreactivities, respectively. The area surrounded by a *white dashed line* indicates the dorsal horn of the spinal cord. The area surrounded by a *red dashed line* indicates the SDH. *Arrowheads* and *arrows* indicate c-Fos-positive spinal neurons in the SDH and deep dorsal horn, respectively. *Scale bar* = 100  $\mu$ m.



intensity (ipsilateral side/contralateral side) was calculated to determine the value for each animal. In naive mice, the relative intensity of the gray level was determined by dividing the gray level on the left side by that on the right side.

The number of c-Fos-positive neurons was counted in four to six mice from each group. Analyses were performed on six randomly selected sections from each animal. The number of c-Fos-positive neurons per section was calculated as the mean of six sections for each mouse.

A person who was blinded to the experimental design selected sections for each mouse, performed quantitative measurement of CGRP expression, and counted the number of c-Fos-positive neurons.

### Statistical Analysis

All statistical analyses were performed using GraphPad Prism software (GraphPad, San Diego, CA) and Ekuserutoukei 2010 (Social Survey Research Information, Tokyo, Japan). Comparisons were performed using a two-tailed hypothesis testing. The sample size was based on previous similar studies.<sup>6,16</sup> Data are expressed as means  $\pm$  SDs. For continuous data, normal distribution of values was determined by the Kolmogorov–Smirnov test. GPSs and PWLs were compared among the groups by two-way ANOVA for repeated measures with Tukey *post hoc* test. MT was presented as the median with first and third quartiles. Data for MT were analyzed using Friedman test for within-group analysis and the Kruskal–Wallis test for between-group comparisons followed by Dunnett *post hoc* test. PWLs after intrathecal or intraplantar injection of CGRP<sub>8-37</sub> were compared among groups by two-way ANOVA for repeated

measures with Tukey *post hoc* test. Nonparametric data were analyzed with the Mann–Whitney U test or the Kruskal–Wallis test. To analyze the dose dependency of the effects of CGRP<sub>8-37</sub>, the Jonckheere–Terpstra test was used. *P* value less than 0.05 was considered as statistically significant. No data for mice were lost during the experiment or were missed in the statistical analyses.

## Results

### Basal Responses to Noxious Mechanical and Heat Stimuli in $\alpha$ CGRP Knockout Mice

Basal MT to von Frey filaments in  $\alpha$ CGRP knockout mice (1.8 [1.1 to 2.3], *n* = 13) was not significantly different from that in WT mice (1.5 [1.2 to 2.6], *n* = 13), and basal PWL to noxious heat stimuli in  $\alpha$ CGRP knockout mice (10.4  $\pm$  0.9 s, *n* = 18) was also not significantly different from that in WT mice (10.9  $\pm$  1.6 s, *n* = 17). In addition,  $\alpha$ CGRP knockout mice showed normal weight bearing.

### Paw Edema after Plantar Incision and CFA Injection

Paw thickness in  $\alpha$ CGRP knockout mice was comparable with that in WT mice before incision and CFA injection (fig. 2). Plantar incision significantly increased the thickness of the incised paw, which was apparent 4 h after incision and lasted for at least 24 h in both  $\alpha$ CGRP knockout mice and WT mice (*P* < 0.05, *vs.* 0 h; fig. 2A). Thickness of the incised paw in  $\alpha$ CGRP knockout mice was comparable with that in WT mice throughout the observation period. CFA injection also increased the thickness of the injected paw in both  $\alpha$ CGRP knockout mice and WT mice (*P* < 0.05, *vs.* 0 h; fig. 2B). Increased paw thickness was apparent 4 h after

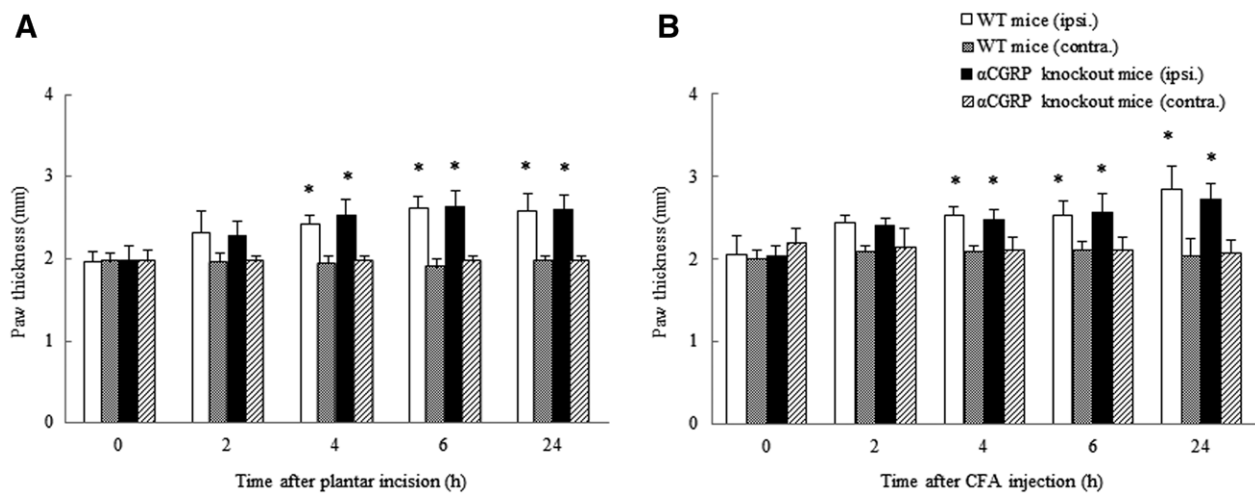

**Fig. 2.** Paw edema after incision and complete Freund's adjuvant (CFA) injection. (A) Time courses of changes in paw thickness in  $\alpha$ -calcitonin gene-related peptide ( $\alpha$ CGRP) knockout mice and wild-type (WT) mice before and after incision. (B) Time courses of changes in paw thickness in  $\alpha$ CGRP knockout mice and WT mice before and after CFA injection. Paw thickness significantly increased from 4 h after incision and CFA injection and thereafter both in  $\alpha$ CGRP knockout mice and WT mice compared with that before incision and CFA injection. However, there were no significant differences in paw thickness between  $\alpha$ CGRP knockout mice and WT mice after incision and CFA injection. *n* = 5 or 6 in each group. Data are expressed as means  $\pm$  SDs. \**P* < 0.05 compared with 0 h (baseline). Contralateral (contra.) = paw on the contralateral side to incision or CFA injection; ipsilateral (ipsi.) = paw on the ipsilateral side to incision or CFA injection.

incision and lasted for at least 24 h in both  $\alpha$ CGRP knockout mice and WT mice. Thickness of the injected paw in  $\alpha$ CGRP knockout mice was comparable with that in WT mice throughout the observation period. In both pain models, paw thickness on the contralateral side to the incision or CFA injection was not changed.

### Involvement of $\alpha$ CGRP in Postoperative Pain

Skin incision increased GPSs and decreased PWLs and MTs in both  $\alpha$ CGRP knockout mice and WT mice. GPSs were significantly increased at 2, 4, and 6 h after incision compared with those before incision in both  $\alpha$ CGRP knockout mice and WT mice ( $P < 0.05$  in both types of mice, *vs.* 0 h; fig. 3A). There was no significant difference in GPS between  $\alpha$ CGRP knockout mice and WT mice at each time point. PWLs and MTs were significantly decreased at 2 h after incision compared with those before incision in both types of mice ( $P < 0.05$  in both types of mice; fig. 3, B and C). Significant decreases in PWLs and MTs were prolonged until 72 h after incision in both types of mice ( $P < 0.05$ , *vs.* 0 h).

There was no significant difference in MT or PWL between  $\alpha$ CGRP knockout mice and WT mice at each time point.

### Involvement of $\alpha$ CGRP in Inflammatory Pain

Complete Freund's adjuvant injection increased GPSs in both  $\alpha$ CGRP knockout mice and WT mice. In WT mice, GPSs were significantly increased at 2 to 72 h after CFA injection compared with that before CFA injection ( $P < 0.05$ ; fig. 4A). In  $\alpha$ CGRP knockout mice, GPSs were significantly increased at only 2 to 24 h after CFA injection compared with that before CFA injection ( $P < 0.05$ ; fig. 4A). Although GPSs in  $\alpha$ CGRP knockout mice were comparable with those in WT mice at 2, 4, and 6 h after CFA injection, GPSs in  $\alpha$ CGRP knockout mice were significantly lower than those in WT mice at 24 and 48 h after CFA injection ( $P < 0.05$ ; fig. 4A).

Complete Freund's adjuvant injection decreased PWLs and MTs in both WT mice and  $\alpha$ CGRP knockout mice. In WT mice, CFA injection significantly decreased PWLs at 2 to 168 h after CFA injection compared with that before CFA injection. In  $\alpha$ CGRP knockout mice, PWLs were significantly

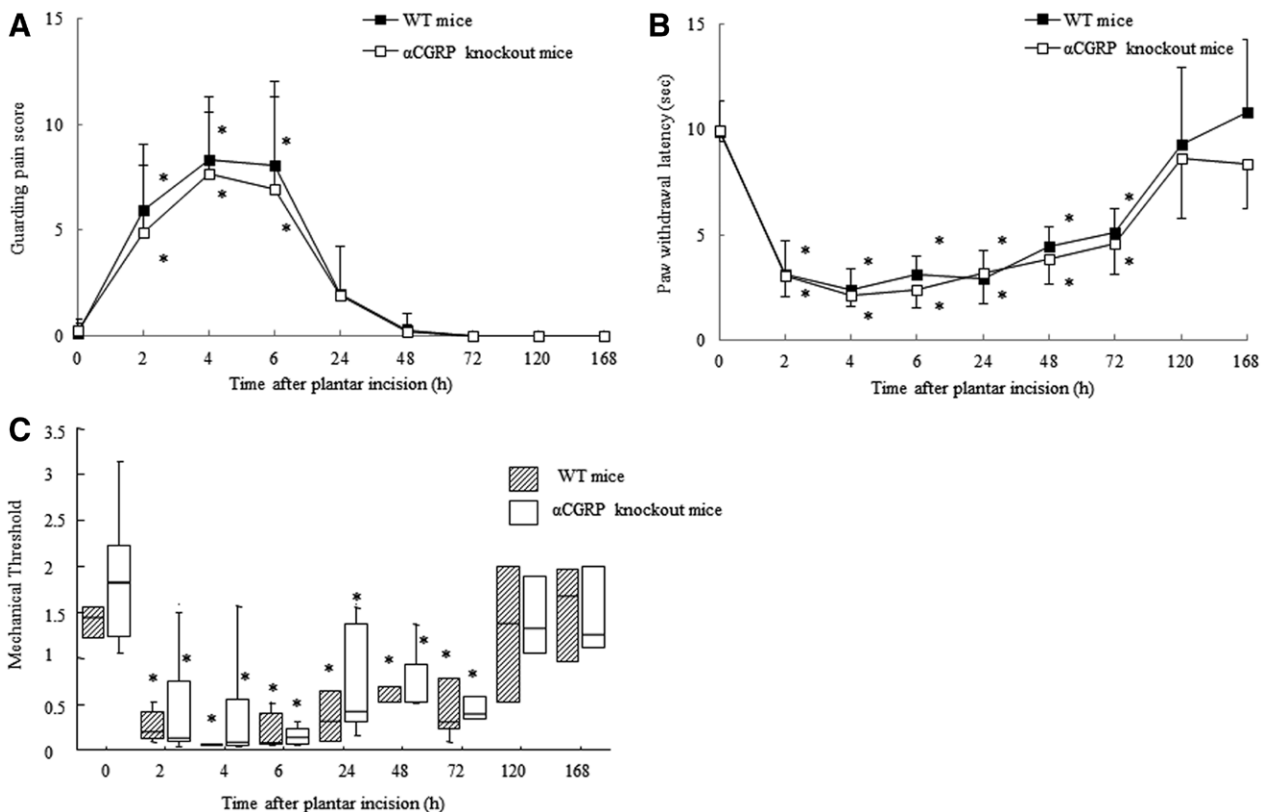

**Fig. 3.** Guarding pain score (GPS), paw withdrawal latency (PWL), and 50% mechanical withdrawal threshold (MT) after incision. (A) Time courses of GPSs after incision in  $\alpha$ -calcitonin gene-related peptide ( $\alpha$ CGRP) knockout mice and in wild-type (WT) mice.  $n = 12$  in  $\alpha$ CGRP knockout mice,  $n = 15$  in WT mice. (B) Time courses of PWLs after incision in  $\alpha$ CGRP knockout mice and WT mice.  $n = 6$  in each group. (C) Time courses of MTs after incision in  $\alpha$ CGRP knockout mice and WT mice.  $n = 6$  in each group. GPSs were significantly increased at 2–6 h after incision, and PWLs and MTs were significantly decreased at 2–72 h after incision compared with those before incision in both  $\alpha$ CGRP knockout mice and WT mice. There were no significant differences in GPSs, PWLs, and MTs between  $\alpha$ CGRP knockout mice and WT mice at each time point. Data for GPS and PWL are expressed as means  $\pm$  SDs. Data for MTs are expressed as medians (*horizontal line*) with 1st and 3rd quartiles (*boxes*) and 10th and 90th percentiles (*vertical lines*). \* $P < 0.05$ , versus 0 h (baseline).

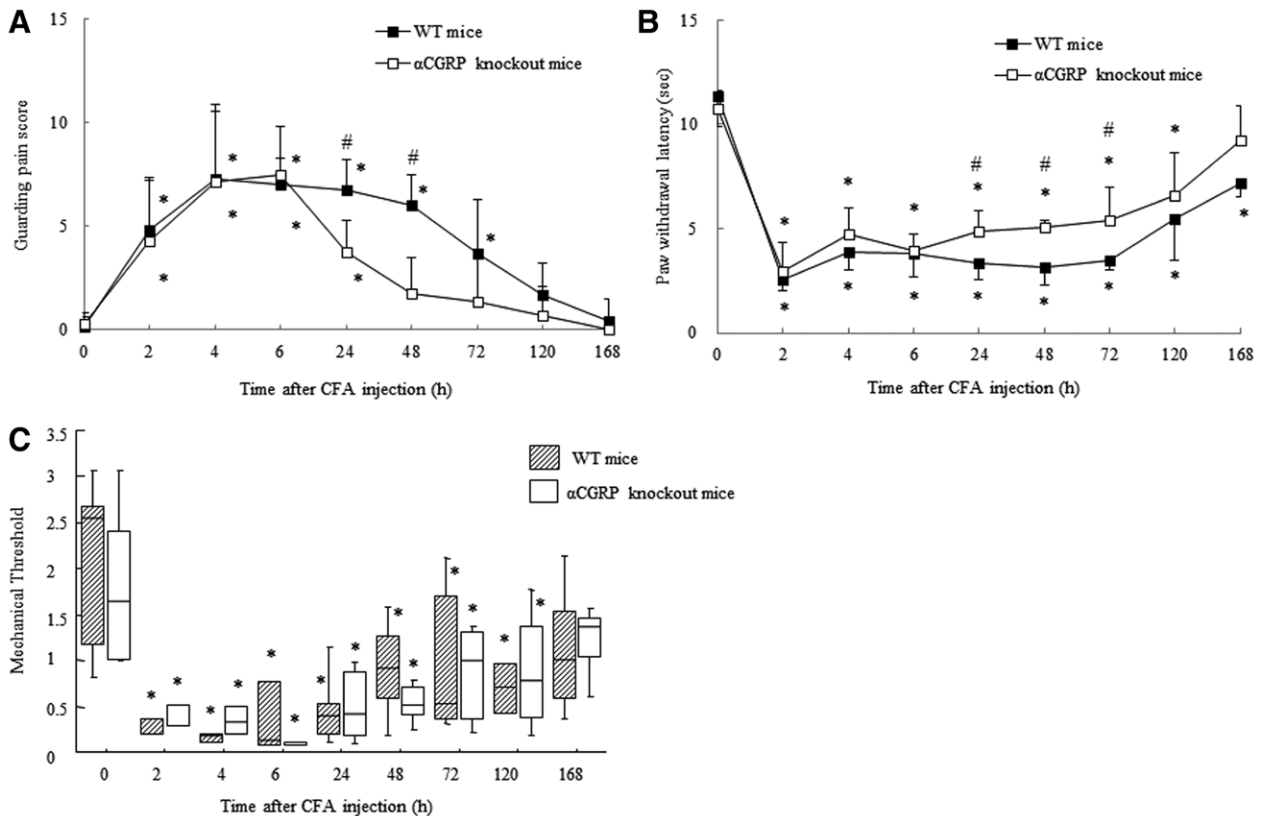

**Fig. 4.** Guarding pain score (GPS), paw withdrawal latency (PWL), and 50% mechanical withdrawal threshold (MT) after complete Freund's adjuvant (CFA) injection. (A) Time courses of GPSs in  $\alpha$ -calcitonin gene-related peptide ( $\alpha$ CGRP) knockout mice and in wild-type (WT) mice after CFA injection.  $n = 8$  in  $\alpha$ CGRP knockout mice,  $n = 9$  in WT mice. (B) Time courses of PWLs in  $\alpha$ CGRP knockout mice and WT mice after CFA injection.  $n = 13$  in  $\alpha$ CGRP knockout mice,  $n = 11$  in WT mice. (C) Time courses of MTs in  $\alpha$ CGRP knockout mice and WT mice after CFA injection.  $n = 7$  in each group. In  $\alpha$ CGRP knockout mice, GPSs were significantly increased at 2–24 h after CFA injection, but in WT mice, GPSs were significantly increased at 2–72 h after CFA injection compared with that before CFA injection. GPSs in  $\alpha$ CGRP knockout mice were significantly lower than those in WT mice at 24 and 48 h after CFA injection. CFA injection significantly decreased PWLs at 2–120 h after CFA injection in  $\alpha$ CGRP knockout mice and decreased PWLs at 2–168 h after CFA injection in WT mice compared with that before CFA injection. PWLs in  $\alpha$ CGRP knockout mice were significantly longer than those in WT mice at 24–72 h after CFA injection. CFA injection also significantly decreased MTs at 2–120 h after CFA injection, compared with that before CFA injection, in both  $\alpha$ CGRP knockout mice and WT mice. However, there was no significant difference in MT between  $\alpha$ CGRP knockout mice and WT mice at each time point. Data for GPSs and PWLs are expressed as means  $\pm$  SDs. Data for MTs are expressed as medians (horizontal line) with 1st and 3rd quartiles (boxes) and 10th and 90th percentiles (vertical lines). \* $P < 0.05$ , versus 0 h (baseline). # $P < 0.05$ ,  $\alpha$ CGRP knockout mice versus WT mice.

decreased at 2 to 120 h after CFA injection compared with that before CFA injection ( $P < 0.05$ ; fig. 4B). Although PWLs in  $\alpha$ CGRP knockout mice were comparable with those in WT mice at 2, 4, 6, 120, and 168 h after CFA injection, PWLs in  $\alpha$ CGRP knockout mice were significantly longer than those in WT mice at 24, 48, and 72 h after CFA injection ( $P < 0.05$ ; fig. 4B). CFA injection also significantly decreased MTs at 2 to 120 h after CFA injection compared with that before CFA injection in both WT mice and  $\alpha$ CGRP knockout mice ( $P < 0.05$  in both types of mice; fig. 4C).

#### Effects of Intrathecal and Intraplantar Administration of CGRP<sub>8-37</sub> on Thermal Hyperalgesia in Inflammatory Pain

To examine the site of action of CGRP, we examined the effects of intrathecal or intraplantar administration of the

CGRP receptor antagonist CGRP<sub>8-37</sub> on decreased PWLs in WT mice after CFA injection. Twenty-four hours after CFA injection, CGRP<sub>8-37</sub> or a vehicle (saline) was administered. Intrathecal administration of CGRP<sub>8-37</sub> significantly reversed the decreased PWLs after CFA injection in a dose-dependent manner ( $P < 0.001$ ; fig. 5, A and B). However, intraplantar administration of CGRP<sub>8-37</sub> did not have any effects on the decreased PWLs even at a dose of 5 nmol, which was 10 times higher than the highest dose (0.5 nmol) used in intrathecal administration (fig. 5C). Intrathecal and intraplantar administration of CGRP<sub>8-37</sub> did not affect PWLs of the paw on the contralateral side to CFA injection (data not shown). Intraplantar administration of 10 nmol CGRP<sub>8-37</sub> into the hind paw ipsilateral to the site of inflammation slightly reversed thermally decreased PWLs (from

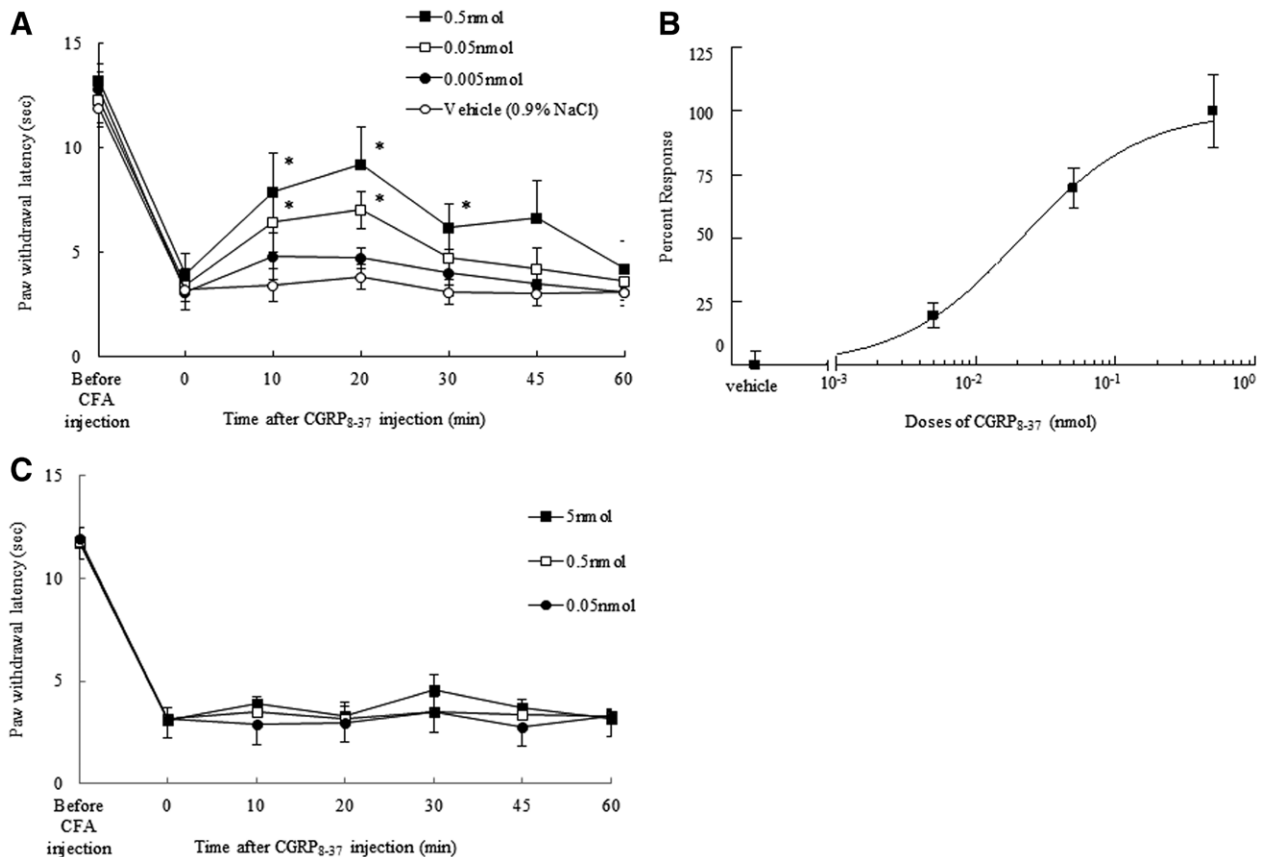

**Fig. 5.** Effects of intrathecal and intraplantar administration of calcitonin gene-related peptide (CGRP) antagonist on paw withdrawal latency (PWL) after complete Freund's adjuvant (CFA) injection. (A) Time courses of PWLs in wild-type mice after intrathecal administration of a CGRP receptor antagonist, CGRP<sub>8-37</sub>. CGRP<sub>8-37</sub> (0.005, 0.05, or 0.5 nmol) or a vehicle was administered 24 h after CFA injection.  $n = 5$  or  $6$  in each group. (B) Dose-response relationship of intrathecal CGRP<sub>8-37</sub>.  $n = 5$  or  $6$  in each group. (C) Time courses of PWLs in wild-type mice after intraplantar administration of CGRP<sub>8-37</sub>. CGRP<sub>8-37</sub> (0.05, 0.5, or 5 nmol) was administered 24 h after CFA injection.  $n = 4$  in each group. Intrathecal administration of CGRP<sub>8-37</sub> significantly reversed the decreased PWLs in a dose-dependent manner. Intraplantar administration of CGRP<sub>8-37</sub> did not have any effects on the decreased PWLs even at a dose of 5 nmol. Data are expressed as means  $\pm$  SDs.  $*P < 0.001$ , versus vehicle.

$3.8 \pm 1.3$  s to  $5.4 \pm 0.1$  s). However, intraplantar administration of 10 nmol CGRP<sub>8-37</sub> into the contralateral hind paw also slightly reversed thermally decreased PWLs to the same degree as ipsilateral administration (from  $3.9 \pm 0.2$  s to  $5.5 \pm 0.2$  s). These results indicate that the antihyperalgesic effect of 10 nmol CGRP<sub>8-37</sub> was mediated systemically rather than locally. Therefore, we used CGRP<sub>8-37</sub> at a dose of 5 nmol as a maximal dose.

### CGRP Expression in the SDH after Plantar Incision and CFA Injection

Calcitonin gene-related peptide expression in the SDH was assessed in WT mice at 4 and 24 h after incision and CFA injection. Intense CGRP immunoreactivity was observed in the SDH in naive mice (fig. 6A), and the relative intensity of CGRP immunoreactivity (right side/left side) was  $1.03 \pm 0.21$  (fig. 6B). CGRP immunoreactivity in the SDH on the ipsilateral side to the incision and CFA injection was not greatly increased at 4 h after incision and CFA injection, and the

relative intensities of CGRP immunoreactivity at 4 h after incision and CFA injection were  $1.01 \pm 0.20$  and  $1.03 \pm 0.18$ , respectively (fig. 6B). However, at 24 h after CFA injection, CGRP immunoreactivity in the SDH on the ipsilateral side to the CFA injection was greatly increased (fig. 6A), and the relative intensity of CGRP immunoreactivity was significantly increased to  $1.24 \pm 0.24$  ( $P < 0.01$ ; fig. 6B). In contrast, CGRP immunoreactivity in the SDH was not increased even at 24 h after incision (fig. 6A); the relative intensity of CGRP immunoreactivity was  $0.98 \pm 0.19$  (fig. 6B).

Because we used an antibody against both  $\alpha$ CGRP and  $\beta$ CGRP in this experiment, there is the possibility that  $\beta$ CGRP expression was increased in the SDH. Therefore, we examined CGRP expression in the SDH in  $\alpha$ CGRP knockout mice. CGRP immunoreactivity was below the detection level in naive  $\alpha$ CGRP knockout mice at 24 h after CFA injection (fig. 6C), suggesting that  $\alpha$ CGRP expression but not  $\beta$ CGRP expression was increased in the SDH after CFA-induced inflammation.



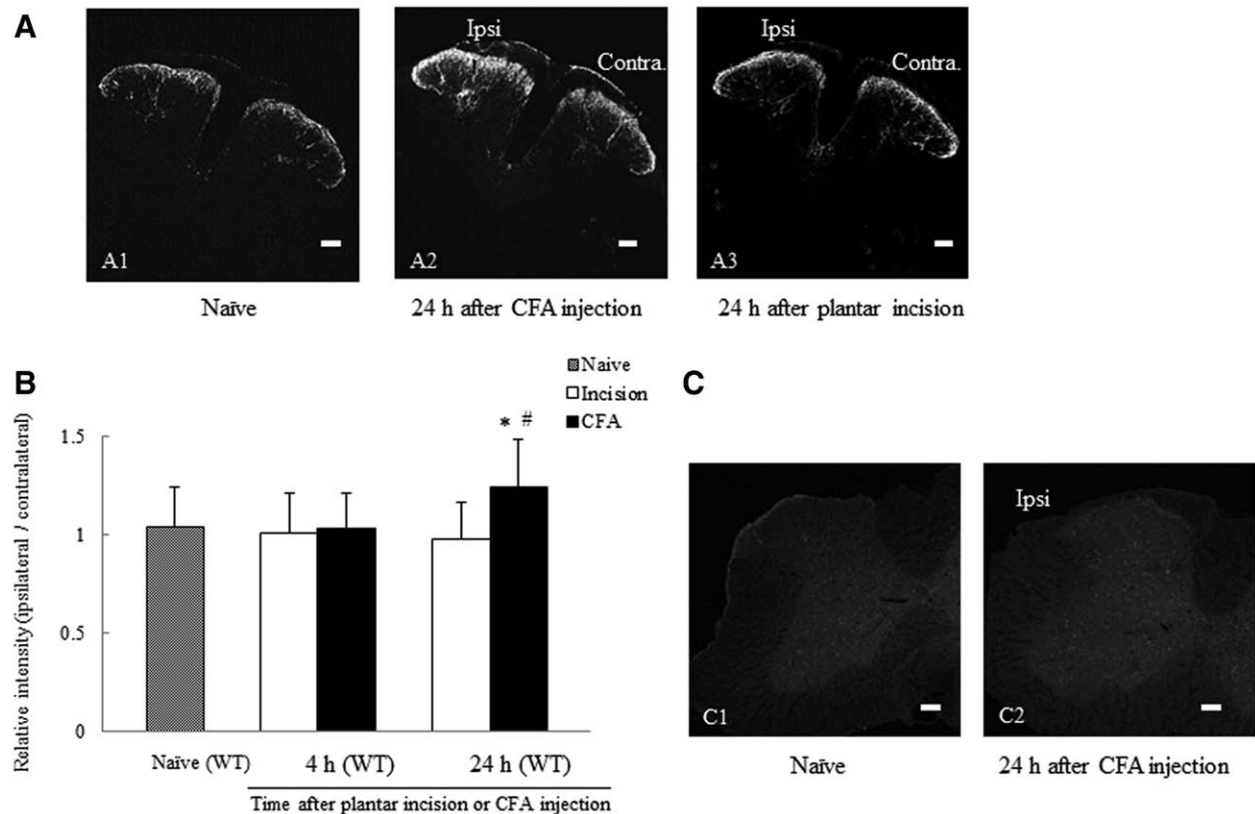

**Fig. 6.** Calcitonin gene-related peptide (CGRP) expression in the superficial dorsal horn (SDH) of the spinal cord after incision and complete Freund's adjuvant (CFA) injection. (A) Representative  $\alpha\beta$ CGRP expression in the SDH of the L4 to L5 segments. A1 showed that in naive wild-type (WT) mice. A2 showed that in WT mice at 24 h after CFA injection. A3 showed that in WT mice at 24 h after incision. Scale bar = 100  $\mu$ m. (B) Relative intensity of CGRP immunoreactivity after incision and CFA injection. (C) Representative  $\alpha\beta$ CGRP expression in the SDH of the L4 to L5 segments. C1 showed that in naive  $\alpha$ CGRP knockout mice. C2 showed that in  $\alpha$ CGRP knockout mice at 24 h after CFA injection. Scale bar = 100  $\mu$ m.  $n = 4-6$  in each group. Intense CGRP immunoreactivity was observed in the SDH of naive mice. CGRP expression was not altered at 4 and 24 h after incision and at 4 h after CFA injection. However, CGRP expression in the SDH on the ipsilateral side was increased at 24 h after CFA injection. CGRP immunoreactivity was below the detection level in naive  $\alpha$ CGRP knockout mice and also below the detection level 24 h after CFA injection. Data are expressed as means  $\pm$  SDs. \* $P < 0.01$ , versus 4 h after CFA injection. # $P < 0.01$ , versus naive. Contralateral (contra.) = paw on the contralateral side to incision or CFA injection; ipsilateral (ipsi.) = paw on the ipsilateral side to incision or CFA injection.

### ***c-Fos* Expression in the SDH after Plantar Incision and CFA Injection**

Few *c-Fos*-positive neurons were observed in the SDH in naive mice that did not receive incision or CFA injection (data not shown). The numbers of *c-Fos*-positive neurons in the SDHs on the ipsilateral side to the incision and CFA injection were significantly increased at 4 h after incision and CFA injection compared with those on the contralateral side ( $P < 0.0001$ ; fig. 7, A and B). There were no significant differences in the number of *c-Fos*-positive neurons between the incision group and CFA injection group in WT mice. The increased number of *c-Fos*-positive neurons was maintained at 24 h after CFA injection, whereas the number of *c-Fos*-positive neurons was greatly decreased at 24 h after incision and was comparable with that on the contralateral side (fig. 7B).

Complete Freund's adjuvant injection significantly increased the number of *c-Fos*-positive neurons in the

SDH on the ipsilateral side to injection in  $\alpha$ CGRP knockout mice at 4 and 24 h after CFA injection ( $P < 0.01$ ; fig. 7, A and B). The number of *c-Fos*-positive neurons in  $\alpha$ CGRP knockout mice was comparable with that in WT mice at 4 h after CFA injection. However, the number of *c-Fos*-positive neurons in  $\alpha$ CGRP knockout mice was significantly lower than that in WT mice at 24 h after CFA injection ( $P < 0.0001$ ; fig. 7B).

### **Discussion**

New findings in this study are as follows: (1)  $\alpha$ CGRP is not involved in incision-induced spontaneous pain assessed as GPS, thermal hyperalgesia, or mechanical hyperalgesia, (2)  $\alpha$ CGRP plays an important role in inflammation-induced spontaneous pain and thermal hyperalgesia but not in mechanical hyperalgesia, (3)  $\alpha$ CGRP is involved in the late



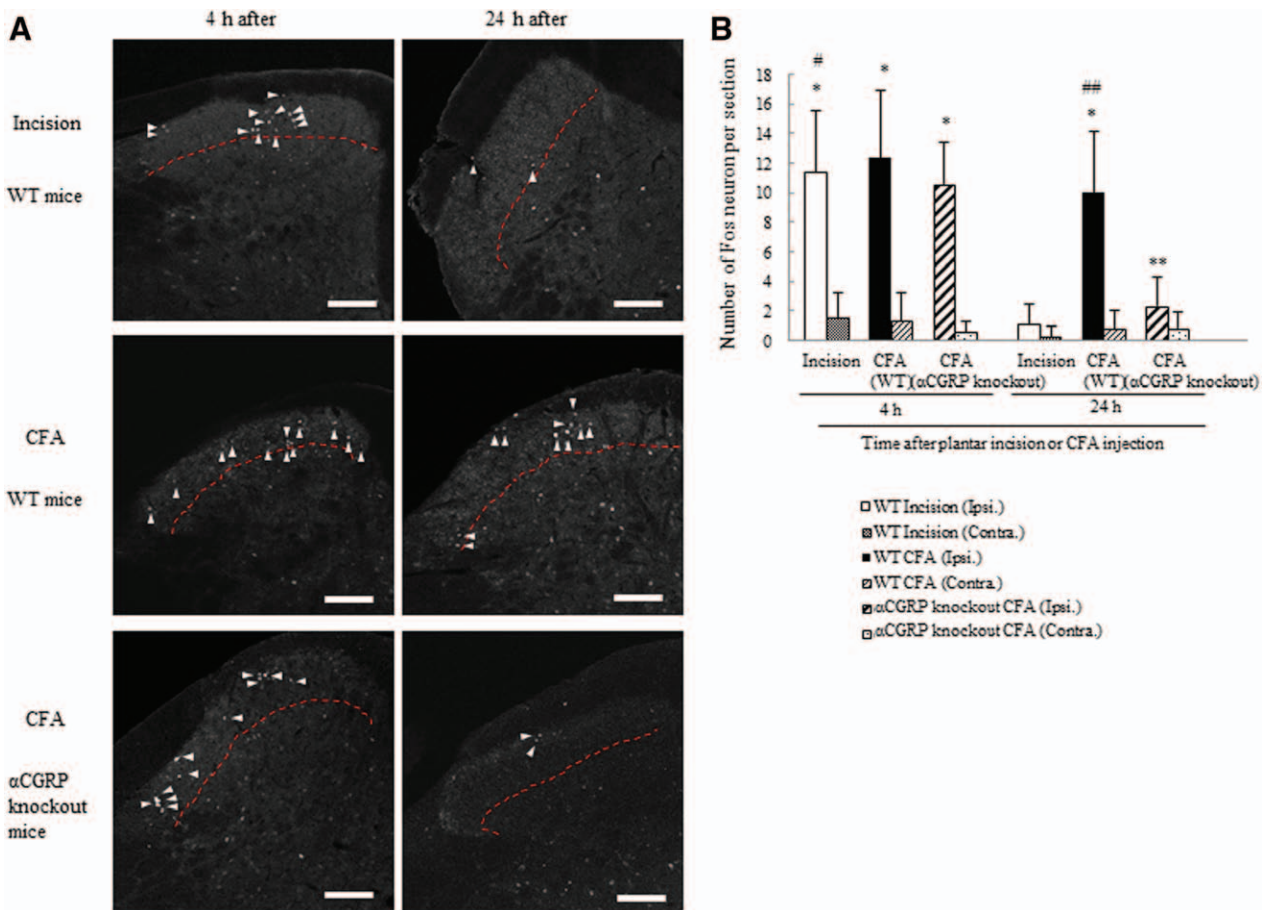

**Fig. 7.** Changes in c-Fos expression in the superficial dorsal horn (SDH) of the spinal cord after incision and complete Freund's adjuvant (CFA) injection. (A) Representative c-Fos expression in the SDH of the L4 to L5 segments at 4 and 24 h after incision and CFA injection in wild-type (WT) mice and  $\alpha$ -calitonin gene-related peptide ( $\alpha$ CGRP) knockout mice. All photographs show the SDH on the ipsilateral side to incision or CFA injection. Arrowheads indicate c-Fos-positive neurons, and red dashed lines indicate the ventral boarder of the SDH defined by protein kinase C $\gamma$  expression. Scale bar = 100  $\mu$ m. (B) Numbers of c-Fos-positive neurons in the SDH at 4 and 24 h after incision and CFA injection.  $n = 4-6$  in each group. The number of c-Fos-positive neurons in the SDH of WT mice was significantly increased at 4 h after incision but had returned to the basal level at 24 h after incision. The c-Fos-positive profile in WT mice and  $\alpha$ CGRP knockout mice was significantly increased at 4 h after CFA injection, and a significant increase in c-Fos expression was also observed at 24 h after CFA injection in WT mice but not in  $\alpha$ CGRP knockout mice. Data are expressed as means  $\pm$  SDs. \* $P < 0.0001$ , versus contralateral side. \*\* $P < 0.01$ , versus contralateral side. ### $P < 0.0001$ , versus 24 h after incision. ## $P < 0.0001$ , versus  $\alpha$ CGRP knockout mice 24 h after CFA injection. Contralateral (contra.) = contralateral side to incision or CFA injection; ipsilateral (ipsi.) = ipsilateral side to incision or CFA injection.

phase (24 to 72 h after CFA injection) but not in the early phase (within 6 h after CFA injection) of inflammation-induced pain, and (4) spinal action but not peripheral action of  $\alpha$ CGRP is involved in CFA-induced thermal hyperalgesia.

### Spinal CGRP for Nociception in a Normal Condition

It has been reported that intrathecal CGRP<sub>8-37</sub> had antinociceptive effects against nociceptive thermal and mechanical stimuli in a normal condition.<sup>17</sup> However, it has also been shown that intrathecal antiserum against CGRP did not have any analgesic effects on heat and mechanical nociception in a normal condition.<sup>18</sup> An electrophysiological study also showed that spinal application of CGRP<sub>8-37</sub> had no significant effect on normal synaptic transmission in SDH neurons.<sup>19</sup> Both calcitonin and  $\alpha$ CGRP gene-deficient

mice showed normal response to noxious heat stimuli.<sup>6</sup> To determine the involvement of  $\alpha$ CGRP alone in various pain states, research focusing on depletion of  $\alpha$ CGRP alone is necessary. Thus, we have developed mice in which  $\alpha$ CGRP alone is depleted.<sup>9</sup> The fact that normal responses to noxious heat and mechanical stimuli were seen in  $\alpha$ CGRP knockout mice in this study confirms that  $\alpha$ CGRP does not play an important role in pain transmission in a normal condition.

### Contribution of $\alpha$ CGRP to Postoperative Pain and Inflammatory Pain

It is likely that GPSs, PWLs to heat stimuli, and MTs to mechanical stimuli are indices of spontaneous pain, thermal hypersensitivity, and mechanical hypersensitivity, respectively. Because guarding behavior is a nonevoked behavior

and correlates well with spontaneous activity in dorsal horn neurons,<sup>16</sup> it is considered that guarding behavior reflects spontaneous pain.<sup>12</sup> These components of pain consist of postoperative pain after surgery in a clinical setting. In the current study, there were no significant differences in GPSs, PWLs, and MTs between  $\alpha$ CGRP knockout mice and WT mice after incision during the observation period. These results suggest that  $\alpha$ CGRP is not involved in spontaneous pain, mechanical hyperalgesia, or thermal hyperalgesia in postoperative pain after surgery.

In the current study, GPSs significantly increased and PWLs to heat stimulation and MTs to mechanical stimulation significantly decreased in both  $\alpha$ CGRP knockout mice and WT mice up to 6 h after CFA injection (early phase). The increased GPSs and decreased PWLs gradually returned to the basal levels from 24 to 72 h after CFA injection (late phase) in  $\alpha$ CGRP knockout mice, whereas the increased GPSs and decreased PWLs remained relatively constant during the late phase in WT mice. There were no significant changes in MTs between  $\alpha$ CGRP knockout mice and WT mice during the late phase after CFA injection. These results suggest that  $\alpha$ CGRP is involved in spontaneous pain and thermal hyperalgesia seen in the late phase of inflammatory pain. The results based on antihyperalgesic effects of intrathecal but not intraplantar CGRP<sub>8-37</sub> strongly suggest that the spinal action but not peripheral action of  $\alpha$ CGRP is involved in an inflammatory pain state.

### **Mechanisms of $\alpha$ CGRP-induced Inflammatory Pain in the Spinal Cord**

Because guarding behavior correlates well with spontaneous activity in dorsal horn neurons,<sup>16</sup> it seems that spontaneous noxious input to spinal neurons persisted only for 2 to 6 h (early phase) and 2 to 72 h (early and late phases) after incision and CFA injection, respectively. Indeed, it has been reported that, in contrast to a plantar incision pain model, high spontaneous activity in SDH neurons is still present 48 h after CFA injection,<sup>12</sup> suggesting sustained noxious inputs to spinal neurons after CFA injection but not after incision. The findings that the number of c-Fos-positive neurons in the SDH was significantly increased at 4 and 24 h in WT mice and only at 4 h after CFA injection and incision, respectively, which are similar to results in previous reports,<sup>20,21</sup> correlated well with the changes in guarding behavior in the current study. Thus, behavioral and c-Fos studies indicate that intense noxious stimuli that are sufficient to evoke spontaneous pain persist longer after CFA injection than those after incision.

Complete Freund's adjuvant-induced inflammation up-regulates CGRP in DRG neurons.<sup>22</sup> In our study, up-regulation of CGRP in the SDH was observed in the late phase but not in the early phase of CFA-induced inflammatory pain. However, CGRP was not up-regulated in the SDH in the early phase or in the late phase after incision. Therefore, sustained noxious inputs that are sufficient to evoke long-term

spontaneous pain after CFA injection may increase CGRP expression in the SDH. Repetitive stimulation of C-fibers can activate *N*-methyl-D-aspartate receptors in the SDH,<sup>23</sup> resulting in the release of substance P.<sup>24</sup> Many CGRP-containing primary afferents contain substance P and CGRP,<sup>25</sup> and CGRP and substance P are thought to be coreleased by repetitive stimulation of C-fibers.<sup>26</sup> Thus, CGRP would be up-regulated in the late phase but not in the early phase after CFA injection. This may explain why spinal *N*-methyl-D-aspartate receptors are involved in CFA-induced inflammatory pain<sup>27</sup> but not in incisional pain.<sup>28</sup>

It has been reported that CGRP receptors are localized in glutamergic presynaptic terminals of the SDH<sup>29</sup> and that spinal application of CGRP increases glutamate release evoked by electrical stimulation of the dorsal root.<sup>30</sup> In a spinal cord slice obtained from an inflammation-induced pain model, the CGRP receptor antagonist CGRP<sub>8-37</sub> reduced the amplitude of monosynaptic excitatory postsynaptic current although application of CGRP did not affect the frequency of miniature excitatory postsynaptic current.<sup>19</sup> These results suggest that CGRP could facilitate excitatory glutamergic synaptic transmission in the spinal cord by postsynaptic but not presynaptic mechanisms. Taken together with the fact that activation of *N*-methyl-D-aspartate receptors triggers excessive release of CGRP,<sup>23,24</sup> activation of CGRP receptors as well as glutamate receptors, such as  $\alpha$ -amino-3-hydroxy-5-methyl-4-isoxazole propionic acid receptors, *N*-methyl-D-aspartate receptors, and metabotropic glutamate receptors, may contribute to the enhancement of nociceptive transmission in presynaptic and postsynaptic terminals in a coordinated manner in an inflammatory pain state but not in a postoperative pain state.

### **Involvement of CGRP in Spontaneous Pain and Thermal Hyperalgesia in an Inflammatory Pain State**

Previous electrophysiological studies have suggested that many CGRP-expressing DRG neurons respond to noxious heat and mechanical stimuli being classified as polymodal.<sup>31,32</sup> However, it has also been reported that primary afferents with distinct histochemical characteristics such as expression of transient receptor potential cation channel subfamily V member 1 (TRPV1) and MrgprD are selectively involved in thermal or mechanical hyperalgesia.<sup>33</sup> CGRP is expressed in approximately 80% of TRPV1-positive primary afferent neurons<sup>34</sup> but not in MrgprD-positive neurons, and ablation of TRPV1-positive primary afferents has been shown to selectively abolish inflammation-induced thermal hyperalgesia.<sup>33</sup> A recent study using genetic ablation of  $\alpha$ CGRP-expressing primary afferents has also shown that  $\alpha$ CGRP-expressing sensory neurons contribute to noxious heat perception and inflammation-induced thermal hyperalgesia but not to noxious mechanical perception or mechanical hyperalgesia.<sup>5</sup> These findings suggest that CGRP is involved in thermal hyperalgesia but not in mechanical hyperalgesia. The results of our study also showed that

deletion of  $\alpha$ CGRP partially, but not completely, inhibited thermal hyperalgesia, suggesting the contribution of other molecules to thermal hyperalgesia after CFA injection.

Because deletion of the TRPV1 gene completely abolished CFA-induced thermal hyperalgesia,<sup>35</sup> it is proposed that TRPV1 is primarily activated in the inflamed area, and then excitatory amino acids and CGRP are released from TRPV1-positive primary afferents in the spinal cord, resulting in thermal hyperalgesia. However, CFA-induced guarding behavior is not inhibited by a selective TRPV1 antagonist<sup>36</sup> although desensitization of TRPV1-positive afferents by resiniferatoxin completely inhibits CFA-induced guarding behavior. These findings suggest that CFA-induced spontaneous pain depends on TRPV1-positive fibers but not on TRPV1 itself, whereas it is unknown what receptors or channels expressed in TRPV1-positive afferents are responsible for such spontaneous pain. Spinal release of CGRP after activation of TRPV1-positive afferents would be one of the mechanisms underlying CFA-induced spontaneous pain and thermal hyperalgesia.

Our results finally indicate that, although inflammatory pain and postoperative pain share common behavioral phenotypes, the mechanisms of inflammatory pain differ in the involvement of  $\alpha$ CGRP from those of postoperative pain. Previous studies have shown different pharmacological responses between the two types of pain.<sup>28,37</sup> Thus, even if the phenotypes of pain-related behavior are the same, the effects of drugs depend on the etiology of pain.

### Study Limitations

A previous study showed that the expression level of  $\beta$ CGRP in DRG neurons is much lower than that of  $\alpha$ CGRP.<sup>2</sup> In addition, because CGRP immunoreactivity in the SDH of  $\alpha$ CGRP knockout mice was below the detection level and was not changed at 24 h after incision and CFA injection in the current study, it is likely that  $\beta$ CGRP played little role in CFA- and incision-induced pain in the spinal cord. However, we could not completely exclude the effects of  $\beta$ CGRP in our results.

### Acknowledgments

The authors thank Misuzu Netsu, M.Sc. (Department of Anesthesiology and Resuscitology, Shinshu University School of Medicine, Matsumoto, Japan), for excellent technical assistance.

Supported by grants-in-aid (grant no. 21390432 to Dr. Mikito Kawamata and grant no. 23791698 to Dr. Ishida) from the Japan Society for the Promotion of Science, Tokyo, Japan.

### Competing Interests

The authors declare no competing interests.

### Correspondence

Address correspondence to Dr. Mikito Kawamata: Department of Anesthesiology and Resuscitology, Shinshu University School of Medicine, 3-1-1, Asahi, Matsumoto, Nagano

390-8621, Japan. kawamata@shinshu-u.ac.jp. Information on purchasing reprints may be found at [www.anesthesiology.org](http://www.anesthesiology.org) or on the masthead page at the beginning of this issue. ANESTHESIOLOGY's articles are made freely accessible to all readers, for personal use only, 6 months from the cover date of the issue.

### References

- Boettger MK, Uceyler N, Zelenka M, Schmitt A, Reif A, Chen Y, Sommer C: Differences in inflammatory pain in nNOS-, iNOS- and eNOS-deficient mice. *Eur J Pain* 2007; 11:810–8
- Brennan TJ: Pathophysiology of postoperative pain. *Pain* 2011; 152(3 suppl):S33–40
- Yu LC, Hou JF, Fu FH, Zhang YX: Roles of calcitonin gene-related peptide and its receptors in pain-related behavioral responses in the central nervous system. *Neurosci Biobehav Rev* 2009; 33:1185–91
- Tuchscherer MM, Seybold VS: A quantitative study of the coexistence of peptides in varicosities within the superficial laminae of the dorsal horn of the rat spinal cord. *J Neurosci* 1989; 9:195–205
- McCoy ES, Taylor-Blake B, Street SE, Pribisko AL, Zheng J, Zylka MJ: Peptidergic CGRP $\alpha$  primary sensory neurons encode heat and itch and tonically suppress sensitivity to cold. *Neuron* 2013; 78:138–51
- Zhang L, Hoff AO, Wimalawansa SJ, Cote GJ, Gagel RF, Westlund KN: Arthritic calcitonin/ $\alpha$  calcitonin gene-related peptide knockout mice have reduced nociceptive hypersensitivity. *Pain* 2001; 89:265–73
- Yu LC, Hansson P, Brodda-Jansen G, Theodorsson E, Lundeberg T: Intrathecal CGRP8-37-induced bilateral increase in hindpaw withdrawal latency in rats with unilateral inflammation. *Br J Pharmacol* 1996; 117:43–50
- Bennett AD, Chastain KM, Hulsebosch CE: Alleviation of mechanical and thermal allodynia by CGRP(8-37) in a rodent model of chronic central pain. *Pain* 2000; 86:163–75
- Oh-hashii Y, Shindo T, Kurihara Y, Imai T, Wang Y, Morita H, Imai Y, Kayaba Y, Nishimatsu H, Suematsu Y, Hirata Y, Yazaki Y, Nagai R, Kuwaki T, Kurihara H: Elevated sympathetic nervous activity in mice deficient in  $\alpha$ CGRP. *Circ Res* 2001; 89:983–90
- Toda M, Suzuki T, Hosono K, Kurihara Y, Kurihara H, Hayashi I, Kitasato H, Hoka S, Majima M: Roles of calcitonin gene-related peptide in facilitation of wound healing and angiogenesis. *Biomed Pharmacother* 2008; 62:352–9
- Banik RK, Woo YC, Park SS, Brennan TJ: Strain and sex influence on pain sensitivity after plantar incision in the mouse. *ANESTHESIOLOGY* 2006; 105:1246–53
- Xu J, Brennan TJ: Comparison of skin incision *vs.* skin plus deep tissue incision on ongoing pain and spontaneous activity in dorsal horn neurons. *Pain* 2009; 144:329–39
- Chaplan SR, Bach FW, Pogrel JW, Chung JM, Yaksh TL: Quantitative assessment of tactile allodynia in the rat paw. *J Neurosci Methods* 1994; 53:55–63
- Fairbanks CA: Spinal delivery of analgesics in experimental models of pain and analgesia. *Adv Drug Deliv Rev* 2003; 55:1007–41
- Neumann S, Braz JM, Skinner K, Llewellyn-Smith IJ, Basbaum AI: Innocuous, not noxious, input activates PKC $\gamma$  interneurons of the spinal dorsal horn *via* myelinated afferent fibers. *J Neurosci* 2008; 28:7936–44
- Xu J, Brennan TJ: Guarding pain and spontaneous activity of nociceptors after skin *versus* skin plus deep tissue incision. *ANESTHESIOLOGY* 2010; 112:153–64
- Yu LC, Hansson P, Lundeberg T: The calcitonin gene-related peptide antagonist CGRP8-37 increases the latency to withdrawal responses in rats. *Brain Res* 1994; 653:223–30
- Kawamura M, Kuraishi Y, Minami M, Satoh M: Antinociceptive effect of intrathecally administered antiserum against



- calcitonin gene-related peptide on thermal and mechanical noxious stimuli in experimental hyperalgesic rats. *Brain Res* 1989; 497:199–203
19. Bird GC, Han JS, Fu Y, Adwanikar H, Willis WD, Neugebauer V: Pain-related synaptic plasticity in spinal dorsal horn neurons: Role of CGRP. *Mol Pain* 2006; 2:31
  20. Zhu CZ, Nikkel AL, Martino B, Bitner RS, Decker MW, Honore P: Dissociation between post-surgical pain behaviors and spinal Fos-like immunoreactivity in the rat. *Eur J Pharmacol* 2006; 531:108–17
  21. Schadrack J, Castro-Lopes JM, Avelino A, Zieglgänsberger W, Tölle TR: Modulated expression of c-Fos in the spinal cord following noxious thermal stimulation of monoarthritic rats. *J Neurosci Res* 1998; 53:203–13
  22. Xu P, Van Slambrouck C, Berti-Mattera L, Hall AK: Activin induces tactile allodynia and increases calcitonin gene-related peptide after peripheral inflammation. *J Neurosci* 2005; 25:9227–35
  23. Milligan ED, Watkins LR: Pathological and protective roles of glia in chronic pain. *Nat Rev Neurosci* 2009; 10:23–36
  24. Marvizón JC, Martínez V, Grady EF, Bunnett NW, Mayer EA: Neurokinin 1 receptor internalization in spinal cord slices induced by dorsal root stimulation is mediated by NMDA receptors. *J Neurosci* 1997; 17:8129–36
  25. McCarthy PW, Lawson SN: Cell type and conduction velocity of rat primary sensory neurons with calcitonin gene-related peptide-like immunoreactivity. *Neuroscience* 1990; 34:623–32
  26. Samsam M, Coveñas R, Ahangari R, Yajeya J, Narváez JA, Tramu G: Simultaneous depletion of neurokinin A, substance P and calcitonin gene-related peptide from the caudal trigeminal nucleus of the rat during electrical stimulation of the trigeminal ganglion. *Pain* 2000; 84:389–95
  27. Ren K, Hylden JL, Williams GM, Ruda MA, Dubner R: The effects of a non-competitive NMDA receptor antagonist, MK-801, on behavioral hyperalgesia and dorsal horn neuronal activity in rats with unilateral inflammation. *Pain* 1992; 50:331–44
  28. Pogatzki EM, Zahn PK, Brennan TJ: Effect of pretreatment with intrathecal excitatory amino acid receptor antagonists on the development of pain behavior caused by plantar incision. *ANESTHESIOLOGY* 2000; 93:489–96
  29. Marvizón JC, Pérez OA, Song B, Chen W, Bunnett NW, Grady EF, Todd AJ: Calcitonin receptor-like receptor and receptor activity modifying protein 1 in the rat dorsal horn: Localization in glutamatergic presynaptic terminals containing opioids and adrenergic  $\alpha 2C$  receptors. *Neuroscience* 2007; 148:250–65
  30. Kangrga I, Randic M: Tachykinins and calcitonin gene-related peptide enhance release of endogenous glutamate and aspartate from the rat spinal dorsal horn slice. *J Neurosci* 1990; 10:2026–38
  31. Lawson SN, Crepps B, Perl ER: Calcitonin gene-related peptide immunoreactivity and afferent receptive properties of dorsal root ganglion neurones in guinea-pigs. *J Physiol* 2002; 540(Pt 3):989–1002
  32. Lawson JJ, McIlwrath SL, Woodbury CJ, Davis BM, Koerber HR: TRPV1 unlike TRPV2 is restricted to a subset of mechanically insensitive cutaneous nociceptors responding to heat. *J Pain* 2008; 9:298–308
  33. Cavanaugh DJ, Lee H, Lo L, Shields SD, Zylka MJ, Basbaum AI, Anderson DJ: Distinct subsets of unmyelinated primary sensory fibers mediate behavioral responses to noxious thermal and mechanical stimuli. *Proc Natl Acad Sci U S A* 2009; 106:9075–80
  34. Niiyama Y, Kawamata T, Yamamoto J, Omote K, Namiki A: Bone cancer increases transient receptor potential vanilloid subfamily 1 expression within distinct subpopulations of dorsal root ganglion neurons. *Neuroscience* 2007; 148:560–72
  35. Caterina MJ, Leffler A, Malmberg AB, Martin WJ, Trafton J, Petersen-Zeitz KR, Koltzenburg M, Basbaum AI, Julius D: Impaired nociception and pain sensation in mice lacking the capsaicin receptor. *Science* 2000; 288:306–13
  36. Okun A, DeFelice M, Eyde N, Ren J, Mercado R, King T, Porreca F: Transient inflammation-induced ongoing pain is driven by TRPV1 sensitive afferents. *Mol Pain* 2011; 7:4
  37. Leonard PA, Arunkumar R, Brennan TJ: Bradykinin antagonists have no analgesic effect on incisional pain. *Anesth Analg* 2004; 99:1166–72
